# Supplementary material
Source: HighWire-hosted journal article supplement (https://www.ajevonline.org/highwire/filestream/11874/field_highwire_adjunct_files/0/SupplementalTable_2.xlsx)
Supplement: SupplementalTable_2.xlsx [file SupplementalTable_2.xlsx]

## Sheet: Vitis riparia map
Supplemental Data for:
Bhattarai G, Fennell A, Londo JP, Coleman C and Kovacs LG. 2021.
A novel grape downy mildew resistance locus from Vitis rupestris. Am J Enol Vitic 72:12-20. doi: 10.5344/ajev.2020.20030.
Supplemental Table 2 Vitis riparia map: Markers, ID and its segregation type, phase information, classification, genetic position, corresponding linkage group and genotypes across individuals. Number of markers = 1115; number of F1 individuals = 294.
Individual ID	S1_61235	S1_929902	S1_666584	S1_695458	S1_666669	S1_659894	S1_1688964	S1_2537093	S1_2533272	S1_2533185	S1_2880124	S1_3062243	S1_3025844	S1_3466266	S1_3721305	S1_3757997	S1_3834552	S1_3889266	S1_4021184	S1_4096008	S1_4197004	S1_4279268	S1_4279373	S1_5767561	S1_6289531	S1_6289507	S1_6307621	S1_6691294	S1_6749776	S1_6743053	S1_6912064	S1_7042562	S1_7253240	S1_7356636	S1_7356638	S1_8516414	S1_9284785	S1_9424155	S1_9388557	S1_9060903	S1_9788875	S1_10830747	S1_11168597	S10_4018986	S1_13433555	S1_13411708	S17_4735662	S1_18216118	S1_18477299
	1	1	1	1	1	1	1	1	1	1	1	1	1	1	1	1	1	1	1	1	1	1	1	1	1	1	1	1	1	1	1	1	1	1	1	1	1	1	1	1	1	1	1	1	1	1	1	1	1
	0	2.34	2.91	3.462	3.643	3.876	7.354	12.217	12.326	12.329	13.001	13.699	13.756	14.428	16.223	16.519	16.772	17.335	18.439	19.077	19.838	20.718	21.804	28.349	33.458	33.709	34.008	35.728	36.306	36.554	36.913	38.01	39.976	40.711	41.363	45.216	47.811	47.936	48.279	48.843	50.32	52.817	53.807	56.14	63.924	64.091	65.109	67.881	68.072
160_271_001	nn	np	np	np	np	np	nn	nn	np	np	np	np	np	np	nn	nn	nn	nn	nn	np	nn	np	np	nn	np	np	nn	np	np	nn	nn	nn	np	nn	nn	np	nn	nn	nn	np	nn	nn	nn	np	nn	np	nn	np	nn
160_271_002	np	nn	nn	nn	nn	nn	np	np	nn	nn	nn	nn	nn	nn	np	np	np	np	np	nn	np	nn	nn	np	np	np	nn	np	np	nn	nn	nn	np	nn	nn	np	nn	nn	nn	np	nn	nn	nn	np	nn	np	nn	np	nn
160_271_003	np	nn	--	nn	nn	nn	--	nn	np	np	np	np	np	np	nn	nn	nn	nn	nn	np	nn	np	np	nn	nn	nn	np	nn	nn	np	np	np	nn	np	np	nn	np	np	--	nn	np	np	np	np	nn	np	nn	np	nn
160_271_004	nn	np	np	np	np	np	nn	nn	np	np	np	np	np	np	nn	nn	nn	nn	nn	np	nn	np	np	nn	nn	nn	np	nn	nn	np	np	np	nn	np	np	nn	np	np	np	nn	np	np	np	nn	np	nn	np	nn	np
160_271_005	nn	np	np	np	np	np	nn	nn	np	np	np	np	np	np	nn	nn	nn	nn	nn	np	nn	np	np	nn	--	nn	np	nn	np	nn	nn	nn	np	nn	nn	np	nn	nn	nn	np	nn	nn	nn	np	nn	np	nn	np	nn
160_271_006	nn	np	np	np	np	np	nn	nn	np	np	np	np	np	np	nn	nn	nn	nn	nn	np	nn	np	np	nn	nn	nn	np	nn	np	nn	nn	nn	np	nn	nn	np	nn	nn	nn	np	nn	nn	nn	np	nn	np	nn	np	nn
160_271_007	nn	np	np	np	np	np	nn	nn	np	np	np	np	np	np	--	nn	nn	nn	nn	np	nn	np	np	nn	nn	nn	np	nn	nn	np	np	np	nn	np	np	nn	np	np	np	nn	np	np	np	nn	np	nn	np	nn	np
160_271_009	nn	np	np	np	np	np	nn	nn	np	np	np	np	np	np	nn	nn	nn	nn	nn	np	nn	np	np	nn	nn	nn	np	nn	nn	np	np	np	nn	np	np	nn	np	np	np	nn	np	np	np	nn	np	nn	np	nn	np
160_271_010	np	nn	nn	nn	nn	nn	np	np	nn	nn	nn	nn	nn	nn	np	np	np	np	np	nn	np	nn	nn	np	np	np	nn	np	np	nn	nn	nn	np	nn	nn	--	nn	nn	--	np	nn	nn	nn	np	nn	np	nn	nn	np
160_271_011	np	nn	--	nn	nn	nn	np	np	nn	nn	nn	nn	nn	nn	--	np	np	np	np	nn	np	nn	nn	np	nn	nn	np	nn	nn	np	np	np	nn	np	np	nn	np	np	np	nn	np	np	np	nn	np	nn	np	nn	np
160_271_012	np	nn	nn	nn	nn	nn	np	np	nn	nn	nn	nn	nn	nn	np	np	np	np	np	nn	np	nn	nn	np	np	np	nn	np	np	nn	nn	nn	np	nn	nn	np	nn	nn	nn	np	nn	nn	nn	np	nn	np	nn	np	nn
160_271_013	np	nn	nn	nn	nn	nn	np	np	nn	nn	nn	nn	nn	np	nn	nn	nn	nn	--	np	nn	np	np	nn	nn	nn	np	nn	--	np	np	np	nn	np	np	nn	np	np	np	nn	np	np	np	nn	np	nn	np	nn	np
160_271_014	np	nn	nn	nn	nn	nn	np	np	nn	nn	nn	nn	nn	nn	np	np	np	np	np	nn	np	nn	nn	np	nn	nn	np	nn	--	np	np	np	nn	np	np	nn	np	np	np	nn	np	np	np	nn	np	nn	np	nn	np
160_271_015	nn	np	np	np	np	np	nn	nn	np	np	np	np	np	np	nn	nn	nn	nn	nn	np	nn	np	np	nn	nn	nn	np	nn	--	np	np	np	nn	np	np	nn	np	np	np	nn	np	np	np	nn	np	nn	np	nn	np
160_271_016	nn	np	nn	np	np	np	nn	nn	np	np	np	np	np	np	nn	nn	nn	nn	nn	np	nn	np	np	nn	nn	nn	np	nn	nn	np	np	np	nn	np	np	nn	np	np	--	nn	np	np	np	nn	np	nn	np	nn	np
160_271_017	nn	np	np	np	np	np	nn	nn	np	np	np	np	np	np	nn	nn	nn	nn	nn	np	nn	np	np	nn	nn	nn	np	nn	nn	np	np	np	nn	np	np	nn	np	np	np	nn	np	np	np	nn	np	nn	np	nn	np
160_271_018	nn	np	np	np	np	np	nn	nn	np	np	np	np	np	np	nn	nn	nn	np	np	nn	np	nn	nn	np	np	np	nn	np	np	nn	nn	nn	np	nn	nn	np	nn	nn	nn	np	nn	nn	nn	np	nn	np	nn	np	nn
160_271_019	np	nn	nn	nn	nn	nn	np	np	nn	nn	nn	nn	nn	nn	np	np	np	np	--	nn	np	nn	nn	np	np	np	nn	np	np	nn	nn	nn	np	nn	nn	--	np	np	np	nn	np	np	np	nn	np	nn	np	nn	np
160_271_020	nn	--	np	np	np	np	nn	nn	np	np	np	np	np	np	nn	nn	nn	nn	nn	np	nn	np	np	nn	nn	nn	np	nn	--	np	np	np	nn	np	np	nn	np	np	np	nn	np	np	np	nn	np	nn	np	nn	np
160_271_021	np	nn	--	nn	nn	nn	np	np	nn	nn	nn	nn	nn	nn	np	np	np	np	nn	np	nn	np	nn	nn	--	nn	np	nn	nn	np	np	np	nn	np	np	nn	np	np	--	nn	np	np	np	nn	np	nn	np	nn	np
160_271_022	np	nn	nn	nn	nn	nn	np	np	nn	nn	nn	nn	nn	nn	np	np	np	np	np	nn	nn	np	np	nn	np	nn	np	nn	nn	np	np	np	nn	np	np	nn	np	np	np	nn	np	np	np	nn	np	nn	np	nn	np
160_271_023	np	nn	--	nn	nn	nn	np	np	nn	nn	nn	nn	nn	nn	np	np	np	np	np	nn	np	nn	nn	np	np	np	nn	np	np	nn	nn	nn	np	nn	nn	np	nn	nn	nn	np	nn	nn	nn	np	nn	np	nn	np	nn
160_271_024	np	nn	--	nn	nn	nn	np	np	nn	nn	nn	nn	nn	nn	np	np	np	np	np	nn	np	nn	nn	np	np	np	nn	np	np	nn	nn	nn	np	nn	nn	np	nn	nn	nn	np	nn	nn	nn	np	nn	np	nn	np	nn
160_271_026	nn	np	np	np	np	np	nn	nn	np	np	np	np	np	np	nn	nn	nn	nn	nn	np	nn	np	np	nn	nn	nn	np	np	np	nn	nn	nn	np	nn	nn	np	nn	nn	nn	np	nn	nn	nn	np	nn	np	nn	np	nn
160_271_027	nn	np	np	np	np	np	nn	nn	np	np	np	np	np	np	nn	nn	nn	nn	nn	np	nn	np	np	nn	nn	nn	np	nn	nn	np	np	np	nn	np	np	nn	np	np	--	nn	np	np	np	nn	np	nn	np	nn	np
160_271_028	nn	np	np	np	np	np	nn	nn	np	np	np	np	np	np	nn	nn	nn	nn	nn	np	nn	np	np	nn	nn	nn	np	nn	--	np	np	np	nn	np	np	nn	np	np	np	nn	np	np	np	nn	np	nn	np	nn	np
160_271_029	nn	np	np	np	np	np	nn	nn	np	np	np	np	np	np	nn	nn	nn	nn	nn	np	nn	np	np	np	np	np	nn	np	np	nn	nn	nn	np	nn	nn	np	nn	nn	nn	np	nn	nn	nn	np	nn	np	nn	np	nn
160_271_030	nn	nn	np	np	np	np	nn	nn	np	np	np	np	np	np	--	nn	nn	nn	nn	np	nn	np	np	nn	nn	nn	np	nn	nn	np	np	np	nn	np	np	nn	np	np	--	np	np	np	np	nn	nn	np	nn	np	nn
160_271_031	nn	np	np	np	np	np	nn	nn	np	np	np	np	np	np	nn	nn	nn	nn	--	np	nn	np	np	nn	--	nn	np	nn	nn	np	np	np	np	np	nn	np	nn	nn	np	np	np	nn	np	np	nn	np	nn	np	nn
160_271_032	np	nn	nn	nn	nn	nn	np	np	nn	nn	nn	nn	nn	nn	np	np	np	np	np	nn	np	nn	nn	nn	nn	nn	np	nn	nn	np	np	np	nn	np	nn	nn	np	np	np	nn	np	np	np	nn	np	nn	np	nn	np
160_271_033	nn	np	np	np	np	np	nn	nn	np	np	np	np	np	np	nn	nn	nn	nn	nn	np	nn	np	np	nn	nn	nn	np	nn	nn	np	np	np	nn	np	np	np	nn	nn	nn	np	nn	nn	nn	np	nn	np	nn	np	nn
160_271_036	np	nn	nn	nn	nn	nn	np	np	nn	nn	nn	nn	nn	nn	--	np	np	np	--	nn	np	nn	nn	nn	--	nn	np	nn	nn	np	np	np	nn	np	np	nn	np	np	--	nn	np	np	np	nn	np	nn	np	nn	np
160_271_037	np	nn	nn	nn	nn	nn	np	np	nn	nn	nn	nn	nn	nn	--	np	np	np	np	nn	np	nn	nn	np	np	np	nn	np	np	nn	nn	nn	np	nn	nn	nn	np	np	np	nn	np	np	np	nn	np	nn	np	nn	np
160_271_039	nn	np	np	np	np	np	nn	nn	np	np	np	np	np	np	--	nn	nn	nn	nn	np	nn	np	np	nn	nn	nn	np	nn	nn	np	np	np	nn	np	np	nn	np	np	--	nn	np	np	np	nn	nn	np	nn	np	nn
160_271_040	nn	np	np	np	np	np	nn	nn	np	np	np	np	np	np	nn	nn	nn	nn	--	np	nn	np	np	nn	nn	nn	np	nn	nn	np	np	np	nn	np	np	nn	np	np	np	nn	np	np	np	nn	np	nn	np	nn	np
160_271_041	np	np	nn	nn	nn	np	np	nn	np	np	np	np	np	np	--	nn	nn	nn	nn	np	nn	np	np	nn	nn	nn	np	nn	--	np	np	np	nn	np	np	nn	np	np	--	np	np	np	np	nn	nn	np	nn	np	nn
160_271_042	np	nn	nn	nn	nn	nn	np	np	nn	nn	nn	nn	nn	nn	np	np	np	np	np	nn	np	nn	nn	np	np	np	nn	np	np	nn	nn	nn	np	nn	nn	np	nn	nn	nn	np	nn	nn	nn	np	np	nn	np	nn	np
160_271_044	nn	np	np	np	np	np	np	nn	np	np	np	np	np	np	nn	nn	nn	nn	--	np	nn	np	np	nn	nn	nn	np	nn	nn	np	np	np	nn	np	np	nn	np	np	np	nn	np	np	np	nn	np	nn	np	nn	np
160_271_047	nn	np	np	np	np	np	nn	nn	np	np	np	np	np	np	nn	nn	nn	nn	nn	np	nn	np	np	nn	--	np	nn	np	--	nn	nn	nn	np	nn	nn	np	nn	nn	nn	np	nn	nn	nn	np	nn	np	nn	np	nn
160_271_048	nn	np	np	np	np	np	nn	nn	np	np	np	np	np	np	nn	nn	nn	nn	nn	np	nn	np	np	nn	nn	nn	np	nn	nn	np	np	np	nn	np	np	nn	np	np	np	nn	np	np	np	nn	np	nn	np	nn	np
160_271_049	np	nn	nn	nn	nn	nn	np	np	nn	nn	nn	nn	nn	nn	--	np	np	np	--	nn	np	nn	np	np	np	np	nn	np	np	nn	nn	nn	np	np	nn	np	nn	nn	nn	np	nn	nn	nn	np	nn	np	nn	np	nn
160_271_050	nn	np	np	np	np	np	np	np	nn	nn	nn	nn	nn	nn	np	np	np	np	np	nn	np	nn	nn	np	np	np	nn	np	np	nn	nn	nn	np	nn	nn	np	nn	nn	nn	np	nn	nn	nn	np	np	nn	np	nn	np
160_271_051	nn	np	np	np	np	np	nn	nn	np	np	np	np	np	np	nn	nn	nn	nn	nn	np	nn	np	np	nn	--	nn	np	nn	nn	np	np	np	nn	np	np	nn	np	np	np	nn	np	np	np	nn	np	nn	np	nn	np
160_271_052	np	nn	nn	nn	nn	--	np	np	nn	nn	nn	nn	nn	nn	np	np	np	np	np	nn	np	nn	nn	np	np	np	nn	np	np	nn	nn	nn	np	--	nn	np	nn	nn	nn	np	nn	nn	nn	np	nn	np	nn	np	nn
160_271_055	nn	np	np	np	np	np	nn	np	nn	nn	nn	nn	nn	nn	np	np	np	np	--	nn	np	nn	nn	np	np	np	nn	np	--	nn	nn	nn	np	nn	nn	np	nn	nn	nn	np	nn	nn	nn	np	nn	np	nn	np	nn
160_271_056	np	nn	nn	nn	nn	nn	np	np	nn	nn	nn	nn	nn	nn	np	np	np	np	np	nn	np	nn	nn	np	np	np	nn	np	np	nn	nn	nn	np	nn	nn	np	nn	nn	nn	np	nn	nn	nn	np	nn	np	nn	np	nn
160_271_057	np	nn	nn	nn	nn	nn	np	np	nn	nn	nn	nn	nn	nn	--	np	np	np	--	nn	np	nn	nn	np	np	np	nn	np	--	nn	nn	nn	np	nn	nn	np	nn	nn	--	np	nn	nn	nn	np	nn	np	nn	np	nn
160_271_058	np	nn	nn	nn	nn	nn	np	np	nn	nn	nn	nn	nn	nn	np	np	np	np	np	nn	np	nn	nn	np	np	np	nn	np	np	nn	nn	nn	np	nn	nn	np	nn	nn	nn	np	nn	nn	nn	np	nn	np	nn	nn	np
160_271_059	np	nn	nn	nn	nn	--	np	np	nn	nn	nn	nn	nn	nn	--	np	np	np	--	nn	np	nn	nn	np	np	np	nn	np	np	nn	nn	nn	np	nn	nn	np	nn	nn	nn	np	nn	nn	nn	np	nn	np	nn	np	nn
160_271_060	nn	np	np	np	np	np	nn	nn	np	np	np	np	np	np	nn	nn	nn	nn	nn	np	nn	np	nn	nn	nn	nn	np	nn	nn	np	np	np	nn	np	np	nn	np	np	np	nn	np	np	np	nn	nn	np	nn	np	nn
160_271_061	nn	np	np	np	np	np	nn	nn	np	np	np	np	np	np	nn	nn	nn	nn	nn	np	nn	np	np	nn	np	np	nn	np	np	nn	nn	nn	np	nn	nn	np	nn	nn	nn	np	nn	nn	nn	np	nn	np	nn	np	nn
160_271_062	np	nn	nn	nn	nn	nn	np	np	nn	nn	nn	nn	nn	nn	np	np	np	np	--	nn	np	nn	--	np	np	np	nn	np	np	nn	nn	nn	np	nn	nn	np	nn	nn	nn	np	nn	nn	nn	np	nn	np	nn	np	nn
160_271_063	np	nn	--	nn	nn	nn	--	np	nn	nn	nn	nn	nn	--	np	np	np	np	np	nn	np	nn	np	np	np	np	nn	np	np	nn	nn	nn	np	nn	nn	np	nn	nn	nn	np	nn	nn	nn	np	nn	np	nn	np	nn
160_271_064	np	nn	nn	nn	nn	nn	np	np	nn	nn	nn	nn	nn	nn	np	np	np	np	--	nn	np	nn	nn	np	np	np	nn	np	np	nn	nn	nn	np	nn	nn	np	nn	nn	nn	np	nn	nn	nn	np	nn	np	nn	np	nn
160_271_065	nn	np	np	np	np	np	nn	nn	np	np	np	np	np	np	nn	nn	nn	nn	nn	np	nn	np	np	nn	nn	nn	np	nn	nn	np	np	np	nn	np	np	nn	nn	nn	nn	nn	nn	nn	nn	np	nn	np	nn	np	nn
160_271_066	np	nn	nn	np	nn	nn	--	np	nn	nn	nn	nn	nn	nn	np	np	np	np	np	nn	np	nn	nn	np	--	np	nn	np	np	nn	nn	nn	np	nn	nn	--	nn	nn	nn	np	nn	nn	nn	np	nn	np	nn	np	nn
160_271_067	nn	np	np	np	np	np	nn	nn	np	np	np	np	np	np	nn	nn	nn	nn	nn	np	nn	np	np	nn	--	nn	np	nn	nn	np	np	np	nn	np	np	np	nn	nn	nn	np	nn	nn	nn	np	nn	np	nn	np	nn
160_271_068	np	nn	nn	nn	nn	nn	np	nn	np	np	np	np	np	np	nn	nn	nn	nn	nn	np	nn	np	np	nn	nn	nn	np	nn	nn	np	np	np	nn	np	np	nn	np	np	np	nn	np	np	np	nn	np	nn	np	nn	np
160_271_069	nn	np	np	np	np	np	nn	nn	np	np	np	np	np	np	nn	nn	nn	nn	--	np	nn	np	np	nn	nn	nn	np	nn	nn	np	np	np	nn	np	np	--	np	np	--	nn	np	np	np	nn	nn	np	nn	np	nn
160_271_071	np	nn	nn	nn	nn	nn	np	np	nn	nn	nn	nn	nn	nn	--	np	np	np	np	nn	np	nn	nn	np	np	np	nn	np	np	nn	nn	nn	np	nn	nn	np	nn	nn	nn	np	nn	nn	nn	np	nn	np	nn	np	nn
160_271_072	nn	np	np	np	np	np	--	nn	np	np	np	np	np	np	nn	nn	nn	nn	nn	np	nn	np	--	nn	np	np	nn	np	np	nn	nn	nn	np	nn	nn	np	nn	nn	nn	np	nn	nn	nn	np	nn	np	nn	np	nn
160_271_073	np	nn	nn	nn	nn	nn	np	np	nn	nn	nn	nn	nn	nn	np	np	np	np	np	nn	np	nn	nn	np	np	np	nn	np	np	nn	nn	nn	np	nn	nn	np	nn	nn	nn	np	nn	nn	nn	np	nn	np	nn	np	nn
160_271_074	np	nn	nn	nn	nn	nn	np	np	nn	nn	nn	nn	nn	nn	np	np	np	np	np	nn	np	nn	nn	np	np	np	nn	np	--	nn	nn	nn	np	nn	nn	np	nn	nn	nn	np	nn	nn	nn	np	nn	np	nn	np	nn
160_271_075	nn	np	np	np	np	np	nn	np	nn	nn	nn	nn	nn	nn	np	np	nn	np	--	nn	np	nn	nn	np	np	np	nn	np	np	nn	nn	nn	np	nn	nn	np	nn	nn	nn	np	nn	nn	nn	np	nn	np	nn	np	nn
160_271_076	nn	np	np	np	np	np	nn	nn	np	np	np	np	np	np	--	nn	nn	nn	nn	np	nn	np	np	nn	np	np	nn	np	np	nn	nn	nn	np	nn	nn	--	nn	nn	--	np	nn	nn	nn	np	nn	np	nn	np	nn
160_271_080	nn	np	np	np	np	np	nn	nn	np	np	np	np	np	np	nn	nn	nn	nn	nn	np	nn	np	np	nn	nn	nn	np	nn	nn	np	np	np	nn	np	np	nn	np	np	--	nn	np	np	np	nn	np	nn	np	nn	np
160_271_081	np	nn	nn	nn	nn	nn	np	np	nn	nn	nn	nn	nn	nn	np	np	np	np	np	nn	np	nn	nn	np	np	np	nn	np	np	nn	nn	nn	np	nn	nn	np	nn	nn	nn	np	nn	nn	nn	np	nn	np	nn	np	nn
160_271_082	np	nn	nn	nn	nn	nn	np	np	nn	nn	nn	nn	nn	nn	np	np	np	np	np	nn	np	nn	nn	nn	nn	nn	np	nn	nn	np	np	np	nn	np	np	nn	np	np	np	nn	np	np	np	nn	np	nn	np	nn	np
160_271_083	np	nn	nn	nn	nn	nn	nn	np	nn	nn	nn	nn	nn	nn	np	np	np	np	--	nn	np	nn	nn	np	np	np	nn	np	np	nn	nn	nn	np	--	nn	np	nn	nn	--	np	np	np	np	nn	np	nn	np	nn	np
160_271_084	nn	np	np	np	np	np	nn	nn	np	np	np	np	np	np	nn	nn	nn	nn	nn	np	nn	np	np	np	np	np	nn	np	--	nn	nn	nn	np	nn	nn	np	nn	nn	--	np	nn	nn	nn	np	nn	np	nn	np	nn
160_271_085	nn	np	np	np	np	np	nn	nn	np	np	np	np	np	np	nn	nn	nn	nn	nn	np	nn	np	np	nn	--	nn	np	nn	nn	np	np	np	nn	np	np	nn	np	np	np	nn	np	np	np	nn	np	nn	np	nn	np
160_271_086	np	nn	nn	nn	nn	nn	np	np	nn	nn	nn	nn	nn	nn	np	np	np	np	np	nn	np	nn	nn	np	np	np	nn	np	np	nn	nn	nn	np	nn	nn	np	nn	nn	nn	np	nn	nn	nn	np	nn	np	nn	np	nn
160_271_089	np	np	np	np	np	np	nn	nn	np	np	np	np	np	np	--	nn	nn	nn	nn	np	nn	np	np	nn	nn	nn	np	nn	nn	np	np	np	nn	np	np	nn	np	np	np	nn	np	np	np	nn	np	nn	np	nn	np
160_271_092	nn	np	np	np	np	np	nn	nn	np	np	np	np	np	np	--	nn	nn	nn	nn	np	nn	np	np	nn	nn	nn	np	nn	nn	np	np	np	nn	np	np	--	np	np	--	nn	np	np	np	nn	np	nn	np	nn	np
160_271_094	nn	np	np	np	np	np	nn	nn	np	np	np	np	np	np	nn	nn	nn	nn	nn	np	nn	np	np	nn	nn	nn	np	nn	nn	np	np	np	nn	np	np	nn	np	np	np	nn	np	np	np	nn	np	nn	np	nn	np
160_271_095	np	nn	--	nn	nn	nn	np	np	nn	nn	nn	np	nn	--	--	np	np	np	np	nn	np	nn	nn	np	np	np	nn	np	np	nn	nn	nn	np	nn	nn	np	nn	nn	--	np	nn	nn	nn	np	nn	np	nn	np	nn
160_271_096	nn	np	np	np	np	np	nn	nn	np	np	np	np	np	np	nn	nn	nn	nn	nn	np	nn	np	np	nn	nn	nn	np	nn	nn	np	np	np	nn	np	np	nn	np	np	np	nn	np	np	np	nn	np	nn	np	nn	np
160_271_097	np	nn	nn	nn	nn	nn	np	np	nn	nn	nn	nn	nn	nn	--	np	np	np	--	nn	np	nn	nn	np	np	np	nn	np	np	nn	nn	nn	np	nn	nn	np	nn	nn	nn	np	nn	nn	nn	np	nn	np	nn	np	nn
160_271_098	nn	np	np	np	np	nn	nn	nn	np	np	np	np	np	np	nn	nn	nn	nn	nn	np	nn	np	np	nn	np	np	nn	np	--	nn	nn	nn	np	np	np	np	--	nn	nn	np	nn	nn	nn	np	nn	np	nn	np	nn
160_271_099	nn	np	np	np	np	np	nn	nn	np	np	np	np	np	np	nn	nn	nn	nn	nn	np	nn	np	np	nn	nn	nn	np	nn	nn	np	np	np	nn	np	np	np	nn	nn	nn	np	nn	nn	nn	np	nn	np	nn	np	nn
160_271_100	nn	np	np	np	np	np	nn	nn	np	np	np	np	np	np	nn	nn	nn	nn	--	np	nn	np	np	nn	nn	nn	np	nn	nn	np	np	np	nn	np	np	nn	np	np	np	nn	np	np	np	nn	np	nn	np	nn	np
160_271_101	nn	np	np	np	np	np	nn	nn	np	np	np	np	np	np	nn	nn	nn	nn	nn	np	nn	np	np	nn	nn	nn	np	nn	nn	np	np	np	nn	np	np	nn	np	np	np	nn	np	np	np	np	nn	np	nn	np	nn
160_271_102	np	nn	nn	nn	nn	nn	np	np	nn	nn	nn	nn	nn	nn	np	np	np	np	np	nn	np	nn	nn	np	--	np	nn	np	np	nn	nn	nn	np	nn	nn	nn	np	np	np	nn	np	np	np	nn	np	nn	np	nn	np
160_271_103	np	nn	nn	nn	nn	nn	np	np	nn	nn	nn	nn	nn	nn	np	np	np	np	np	nn	np	nn	nn	nn	nn	nn	np	nn	nn	np	np	np	nn	np	np	nn	np	np	np	nn	np	np	np	nn	np	nn	np	nn	np
160_271_104	np	nn	--	nn	nn	nn	np	np	nn	nn	nn	nn	nn	nn	np	np	np	np	np	nn	np	nn	nn	nn	nn	nn	np	nn	nn	np	np	np	nn	np	np	nn	np	np	np	nn	np	np	np	nn	np	nn	np	nn	np
160_271_105	np	np	np	np	np	np	nn	nn	np	np	np	np	np	np	nn	nn	nn	nn	nn	np	nn	np	np	nn	nn	nn	np	nn	nn	np	np	np	nn	np	np	nn	np	np	np	nn	np	np	np	np	nn	np	nn	np	nn
160_271_106	np	nn	nn	nn	nn	nn	--	np	nn	nn	nn	nn	nn	nn	nn	np	np	np	--	nn	np	nn	nn	np	nn	nn	np	nn	nn	np	np	np	nn	np	nn	nn	np	np	np	nn	np	np	np	nn	np	nn	np	nn	np
160_271_107	np	nn	nn	nn	nn	nn	np	np	nn	nn	nn	nn	nn	nn	np	np	np	np	np	nn	np	nn	nn	np	np	np	nn	np	np	nn	nn	nn	np	nn	nn	np	nn	nn	nn	np	nn	nn	nn	np	nn	np	nn	np	nn
160_271_108	nn	np	np	np	np	np	nn	nn	np	np	np	np	np	np	nn	nn	nn	nn	--	np	nn	np	np	nn	nn	nn	np	nn	nn	np	np	np	nn	np	np	nn	np	np	np	nn	np	np	np	nn	np	nn	np	nn	np
160_271_109	nn	np	np	np	np	np	nn	nn	np	np	np	np	np	np	--	nn	nn	nn	nn	np	nn	np	np	nn	nn	nn	np	nn	nn	np	np	np	nn	np	np	nn	np	np	np	nn	np	nn	nn	np	nn	np	nn	np	nn
160_271_110	nn	np	np	np	np	np	nn	nn	np	np	np	np	np	np	np	np	np	np	np	nn	np	nn	nn	np	np	np	nn	np	np	nn	nn	nn	np	nn	nn	np	nn	nn	--	np	nn	nn	nn	np	nn	np	nn	np	nn
160_271_111	np	nn	nn	nn	nn	nn	np	np	nn	nn	nn	nn	nn	nn	np	np	np	np	--	nn	np	nn	nn	np	np	np	nn	np	np	nn	nn	nn	np	nn	nn	--	nn	nn	nn	np	nn	nn	nn	np	nn	np	nn	np	nn
160_271_112	nn	np	np	np	np	np	nn	nn	np	np	np	np	np	np	nn	nn	nn	nn	nn	np	nn	np	nn	nn	nn	nn	np	nn	--	np	np	np	nn	np	np	nn	np	np	np	nn	np	nn	nn	np	nn	np	nn	np	nn
160_271_114	nn	np	np	np	np	np	nn	nn	np	np	np	np	np	np	--	nn	nn	nn	nn	np	nn	np	np	nn	nn	nn	np	nn	nn	np	np	np	nn	np	np	nn	np	np	np	nn	np	np	np	nn	np	nn	np	nn	np
160_271_115	np	nn	nn	nn	nn	nn	np	np	nn	nn	nn	nn	nn	nn	np	np	np	np	np	nn	np	nn	nn	np	np	np	nn	np	np	nn	nn	nn	np	nn	nn	np	nn	nn	nn	np	nn	nn	nn	np	nn	np	nn	np	nn
160_271_116	np	nn	np	nn	nn	nn	np	np	nn	nn	nn	nn	nn	nn	np	np	np	np	np	nn	np	nn	nn	np	np	np	nn	np	np	nn	nn	nn	np	nn	nn	np	nn	nn	nn	np	nn	nn	nn	np	nn	np	nn	np	nn
160_271_117	np	nn	nn	nn	nn	nn	np	np	nn	nn	nn	np	np	np	nn	nn	nn	nn	nn	np	nn	np	np	nn	nn	nn	np	nn	nn	np	np	np	nn	np	np	nn	np	np	np	nn	np	np	np	nn	np	nn	np	nn	np
160_271_118	np	np	np	np	np	np	nn	nn	np	np	np	np	np	np	nn	nn	nn	nn	nn	np	nn	np	np	np	np	np	nn	np	np	nn	nn	nn	np	nn	nn	np	nn	nn	np	np	nn	nn	nn	np	nn	np	nn	np	nn
160_271_119	nn	np	np	np	np	np	nn	nn	np	np	np	np	np	np	nn	nn	nn	nn	nn	np	nn	np	np	nn	nn	nn	np	nn	nn	np	np	np	nn	np	np	nn	np	np	np	nn	np	np	np	nn	np	nn	np	nn	np
160_271_120	np	np	np	np	np	np	--	np	nn	nn	nn	nn	nn	nn	--	np	np	np	--	nn	np	nn	nn	np	np	np	nn	np	np	nn	nn	nn	np	nn	nn	np	nn	nn	--	np	nn	nn	nn	np	nn	np	nn	np	nn
160_271_121	nn	np	np	np	np	np	nn	nn	np	np	np	np	np	np	nn	nn	nn	nn	nn	np	nn	np	np	nn	nn	nn	np	nn	nn	np	np	nn	np	nn	nn	np	nn	nn	nn	np	nn	nn	nn	np	nn	np	nn	np	nn
160_271_122	np	nn	np	nn	nn	nn	nn	nn	np	np	np	np	np	np	nn	nn	nn	nn	--	np	nn	np	np	nn	nn	nn	np	nn	nn	np	np	np	nn	np	np	nn	np	np	np	nn	np	np	np	nn	np	nn	np	nn	np
160_271_123	np	nn	nn	nn	nn	nn	np	np	nn	nn	nn	nn	nn	nn	np	np	np	np	np	nn	np	nn	nn	np	np	np	nn	np	np	nn	nn	nn	np	nn	nn	np	np	np	np	np	np	np	np	nn	np	nn	np	nn	np
160_271_125	np	nn	nn	nn	nn	nn	--	np	nn	nn	nn	nn	nn	nn	np	nn	nn	nn	nn	np	nn	np	np	nn	nn	nn	np	nn	nn	np	np	np	nn	np	np	nn	np	np	np	nn	np	np	np	nn	np	nn	np	nn	np
160_271_126	nn	np	np	np	np	np	nn	nn	np	np	np	np	np	np	nn	nn	nn	nn	np	nn	np	nn	nn	np	--	np	nn	np	np	nn	nn	nn	np	nn	nn	np	nn	nn	nn	np	nn	nn	nn	np	nn	np	nn	np	nn
160_271_127	np	nn	nn	nn	nn	nn	np	np	nn	nn	nn	nn	nn	nn	np	np	np	np	np	nn	np	nn	nn	np	np	np	nn	np	np	nn	nn	nn	np	nn	nn	np	nn	nn	nn	np	nn	nn	nn	np	np	nn	np	nn	np
160_271_128	nn	np	np	np	np	np	nn	nn	np	np	np	np	np	np	nn	nn	nn	nn	nn	np	nn	np	np	nn	nn	nn	np	nn	nn	np	np	np	nn	np	np	nn	np	np	np	nn	np	np	np	nn	np	nn	np	nn	np
160_271_129	nn	np	np	np	np	np	--	np	nn	nn	nn	nn	nn	nn	--	np	np	np	np	nn	np	nn	nn	np	--	np	nn	np	--	nn	nn	nn	np	nn	nn	np	nn	nn	nn	np	nn	np	np	nn	np	nn	np	nn	np
160_271_130	np	nn	nn	nn	nn	nn	np	np	nn	nn	np	np	np	np	nn	nn	nn	nn	nn	np	nn	np	np	nn	nn	nn	np	nn	nn	np	np	np	nn	np	np	nn	np	np	np	nn	np	np	np	nn	nn	np	nn	np	nn
160_271_131	nn	np	np	np	np	np	np	np	nn	nn	nn	nn	nn	nn	np	np	np	np	np	nn	np	nn	nn	np	np	np	nn	np	np	nn	nn	nn	np	nn	nn	np	nn	nn	nn	np	nn	nn	nn	np	nn	np	nn	np	nn
160_271_132	nn	np	np	np	np	np	np	np	nn	nn	nn	nn	nn	nn	np	np	np	np	np	nn	np	nn	nn	np	--	np	nn	np	np	nn	nn	nn	np	nn	nn	--	nn	nn	--	np	nn	nn	nn	np	nn	np	nn	np	nn
160_271_134	np	nn	nn	nn	nn	nn	np	np	nn	nn	nn	nn	nn	nn	np	np	np	np	np	nn	np	nn	nn	np	np	np	nn	np	np	nn	nn	nn	np	nn	nn	np	nn	nn	nn	np	nn	nn	nn	np	nn	np	nn	np	nn
160_271_135	np	np	nn	np	np	np	nn	nn	np	np	np	np	np	np	nn	nn	nn	nn	--	np	nn	np	np	nn	--	nn	np	nn	--	np	np	np	nn	np	np	--	np	np	--	nn	np	np	np	nn	np	nn	np	nn	np
160_271_136	np	nn	nn	nn	nn	nn	np	np	nn	nn	nn	nn	nn	nn	--	np	np	np	np	nn	np	nn	nn	np	np	np	nn	np	np	nn	nn	nn	np	nn	nn	np	nn	nn	--	np	nn	nn	nn	np	nn	np	nn	np	nn
160_271_137	nn	np	np	np	np	np	nn	nn	np	np	np	np	np	np	nn	np	nn	np	nn	np	nn	np	np	nn	nn	nn	np	nn	nn	np	np	np	nn	np	np	np	nn	nn	nn	np	nn	nn	nn	np	nn	np	nn	np	nn
160_271_138	nn	np	np	np	np	np	nn	nn	np	np	np	np	np	np	nn	nn	nn	nn	nn	np	nn	np	np	nn	nn	nn	np	nn	nn	np	np	np	nn	np	np	nn	np	np	np	nn	np	np	np	nn	np	nn	np	nn	np
160_271_139	nn	np	np	np	np	np	nn	nn	np	np	np	np	np	np	nn	nn	nn	nn	nn	np	nn	np	np	nn	nn	nn	np	nn	nn	np	np	np	nn	np	np	nn	np	np	np	nn	np	np	np	nn	np	nn	np	nn	np
160_271_140	np	nn	--	nn	nn	nn	--	np	nn	nn	nn	nn	nn	nn	np	np	np	np	np	np	nn	np	np	nn	nn	nn	np	nn	nn	np	np	np	nn	np	np	np	np	np	--	nn	np	np	np	nn	np	nn	np	nn	np
160_271_141	np	nn	nn	nn	nn	nn	np	np	nn	nn	nn	nn	nn	nn	np	np	np	np	np	nn	np	nn	nn	np	np	np	nn	np	np	nn	nn	nn	np	nn	nn	np	nn	nn	nn	np	nn	nn	nn	np	nn	nn	nn	np	nn
160_271_143	np	np	--	nn	nn	nn	np	np	nn	nn	nn	nn	nn	nn	np	np	np	np	np	nn	np	nn	nn	np	--	np	nn	np	np	nn	nn	nn	np	nn	nn	np	nn	nn	--	np	nn	nn	nn	np	nn	np	nn	np	nn
160_271_144	nn	np	np	np	np	np	nn	nn	np	np	np	np	np	np	nn	nn	nn	nn	nn	np	nn	np	np	nn	nn	nn	np	nn	nn	np	np	np	nn	np	np	nn	np	np	np	nn	nn	nn	nn	np	nn	np	nn	np	nn
160_271_145	np	nn	nn	nn	nn	nn	np	np	nn	nn	nn	nn	nn	nn	np	np	np	np	np	nn	np	nn	np	np	np	np	nn	np	np	nn	nn	nn	np	nn	nn	np	np	np	np	nn	np	np	np	nn	np	nn	np	nn	np
160_271_146	nn	np	np	np	np	np	nn	nn	np	np	np	np	np	np	nn	nn	nn	nn	nn	np	nn	np	np	nn	nn	nn	np	nn	nn	np	np	np	nn	np	np	nn	np	np	np	nn	np	np	np	nn	np	nn	np	nn	np
160_271_147	nn	np	np	np	np	np	nn	nn	np	np	np	np	np	np	--	nn	nn	nn	nn	np	nn	np	nn	nn	nn	nn	nn	nn	nn	np	np	np	np	nn	nn	np	nn	nn	nn	np	nn	nn	nn	np	nn	np	nn	np	nn
160_271_148	np	nn	--	nn	nn	nn	np	np	nn	nn	nn	nn	nn	nn	np	np	np	np	np	nn	np	nn	nn	np	np	np	nn	np	--	nn	nn	--	np	nn	nn	np	nn	nn	nn	np	nn	nn	nn	np	nn	np	nn	np	nn
160_271_149	np	nn	nn	nn	nn	nn	np	np	nn	nn	nn	nn	nn	nn	--	np	np	np	np	nn	np	nn	nn	nn	nn	nn	np	nn	nn	np	np	np	nn	np	np	nn	np	np	np	nn	np	np	np	nn	np	nn	np	nn	np
160_271_150	nn	np	np	np	np	np	nn	nn	np	np	np	np	np	np	nn	nn	nn	nn	nn	np	nn	np	np	nn	nn	nn	np	nn	nn	np	np	np	nn	np	np	nn	np	np	np	nn	np	np	np	nn	np	nn	np	nn	np
160_271_151	nn	nn	np	np	np	np	nn	nn	np	np	np	np	np	np	nn	nn	nn	nn	nn	np	nn	np	np	nn	nn	nn	np	np	np	nn	nn	nn	np	nn	nn	np	nn	nn	nn	np	nn	nn	nn	np	nn	np	nn	np	nn
160_271_152	nn	np	np	np	np	np	nn	nn	np	np	np	np	np	np	nn	nn	nn	nn	nn	np	nn	np	np	nn	nn	nn	np	nn	nn	np	np	np	nn	np	np	nn	np	np	--	nn	np	np	np	nn	np	nn	np	nn	np
160_271_153	nn	np	np	np	np	np	nn	nn	np	np	np	np	np	np	nn	nn	nn	nn	--	np	nn	np	np	nn	nn	nn	np	nn	nn	np	np	np	nn	np	np	nn	np	np	--	nn	np	np	np	nn	np	nn	np	nn	np
160_271_154	nn	np	np	np	np	np	nn	nn	np	np	np	np	np	np	nn	nn	nn	nn	nn	np	nn	np	np	nn	np	np	nn	nn	--	np	np	np	nn	np	np	nn	np	np	np	nn	np	np	np	nn	np	nn	np	nn	np
160_271_155	np	nn	--	nn	nn	nn	np	np	nn	nn	nn	nn	nn	nn	np	np	np	np	np	nn	np	nn	nn	nn	nn	nn	np	nn	nn	np	np	np	nn	np	np	nn	np	np	np	nn	np	np	np	nn	nn	np	nn	np	nn
160_271_156	np	nn	nn	nn	nn	nn	np	np	nn	nn	nn	nn	nn	nn	--	np	np	np	np	nn	np	nn	nn	nn	nn	nn	np	nn	nn	np	np	np	nn	np	np	nn	np	np	np	nn	np	np	np	nn	np	nn	np	nn	np
160_271_157	nn	np	np	np	np	np	nn	nn	np	np	np	np	np	np	nn	nn	nn	nn	nn	np	nn	nn	np	nn	nn	nn	np	nn	nn	np	np	np	nn	np	np	nn	np	np	np	np	np	np	np	nn	np	nn	np	nn	np
160_271_158	np	nn	nn	nn	nn	nn	nn	nn	np	np	np	np	np	np	nn	nn	nn	nn	nn	np	nn	np	np	nn	nn	nn	np	nn	nn	np	np	np	nn	np	np	nn	np	np	np	nn	np	np	np	nn	np	nn	np	np	nn
160_271_159	nn	np	np	np	np	np	nn	nn	np	np	np	np	np	np	nn	nn	nn	nn	nn	np	nn	np	np	nn	nn	nn	np	nn	nn	np	np	np	nn	np	np	nn	np	np	np	nn	np	np	np	nn	np	nn	np	nn	np
160_271_160	np	nn	nn	nn	nn	nn	np	np	nn	nn	nn	nn	nn	nn	np	np	np	np	np	nn	np	nn	nn	np	np	np	nn	np	np	nn	nn	nn	np	nn	nn	np	nn	nn	nn	np	nn	nn	nn	np	nn	np	nn	np	nn
160_271_161	nn	np	np	np	np	np	nn	nn	np	np	np	np	np	np	nn	nn	nn	nn	nn	np	nn	np	np	nn	nn	nn	np	nn	nn	np	np	np	nn	nn	nn	np	nn	nn	--	np	nn	nn	nn	np	nn	np	nn	np	nn
160_271_162	np	np	np	np	np	np	nn	nn	np	np	np	np	np	np	nn	nn	nn	nn	nn	np	nn	np	np	nn	nn	nn	np	nn	nn	np	np	np	nn	np	np	nn	np	np	np	nn	np	np	np	nn	np	nn	np	nn	np
160_271_163	np	nn	nn	nn	nn	nn	np	np	nn	nn	nn	nn	nn	nn	np	np	np	np	np	nn	np	nn	nn	np	np	np	nn	nn	nn	np	np	np	nn	np	np	nn	np	np	np	nn	np	nn	nn	np	nn	np	nn	np	nn
160_271_164	np	nn	nn	nn	nn	nn	np	np	nn	nn	nn	np	np	np	nn	nn	nn	nn	nn	np	nn	np	np	nn	nn	nn	np	nn	nn	np	np	np	nn	np	np	--	np	np	np	nn	np	np	np	nn	np	nn	np	nn	np
160_271_165	nn	np	np	np	np	np	nn	nn	np	np	np	np	np	np	nn	nn	nn	nn	nn	np	nn	np	np	nn	nn	nn	np	nn	nn	np	np	np	nn	np	np	nn	np	np	np	nn	np	np	np	nn	np	nn	np	nn	np
160_271_166	nn	np	np	np	np	np	nn	nn	np	np	np	np	np	np	nn	nn	nn	nn	nn	np	nn	np	np	nn	nn	nn	np	nn	nn	np	np	np	nn	np	np	nn	np	np	np	nn	np	np	np	nn	np	nn	np	nn	np
160_271_167	nn	np	np	np	np	np	nn	nn	np	np	np	np	np	np	nn	nn	nn	nn	--	np	nn	np	np	np	np	np	nn	np	np	nn	nn	nn	np	nn	nn	np	nn	nn	--	np	np	nn	nn	np	nn	np	nn	np	nn
160_271_169	nn	np	np	np	np	np	nn	np	nn	nn	nn	nn	nn	nn	np	np	np	np	np	nn	np	nn	nn	np	np	np	nn	np	--	nn	nn	nn	np	nn	nn	np	nn	nn	nn	np	nn	nn	nn	np	np	nn	np	nn	np
160_271_171	np	nn	nn	nn	nn	nn	np	np	nn	nn	nn	nn	nn	nn	np	np	np	np	--	nn	np	nn	nn	np	np	np	nn	np	np	nn	nn	nn	np	nn	nn	np	nn	nn	nn	np	nn	nn	nn	np	nn	np	nn	np	nn
160_271_172	nn	np	np	np	np	np	nn	nn	np	np	np	np	np	np	nn	nn	nn	nn	nn	np	nn	np	np	nn	nn	nn	np	nn	nn	np	np	np	np	nn	nn	np	nn	nn	nn	np	nn	nn	nn	np	nn	np	nn	np	nn
160_271_173	np	nn	nn	nn	nn	nn	np	np	nn	nn	nn	nn	nn	nn	np	np	np	np	np	nn	np	nn	nn	np	np	np	nn	np	np	nn	nn	nn	np	nn	nn	np	np	np	np	nn	np	np	np	nn	np	nn	np	nn	np
160_271_174	np	nn	nn	nn	nn	nn	np	np	nn	nn	nn	nn	nn	nn	--	np	np	np	np	nn	np	nn	nn	np	nn	nn	np	nn	nn	np	np	np	nn	np	np	nn	np	np	np	nn	np	np	np	nn	np	nn	np	nn	np
160_271_175	nn	np	np	np	np	np	nn	nn	np	np	np	np	np	np	nn	nn	nn	nn	--	np	nn	np	np	nn	nn	nn	np	nn	nn	np	np	np	nn	np	np	nn	np	np	np	nn	np	np	np	nn	np	nn	np	nn	np
160_271_176	nn	np	np	np	np	np	nn	nn	np	np	np	np	np	np	nn	nn	nn	nn	nn	np	nn	np	np	nn	nn	nn	np	nn	nn	np	np	np	nn	np	np	nn	np	np	np	nn	np	np	np	nn	np	nn	np	nn	np
160_271_177	nn	np	np	np	np	np	nn	nn	np	np	np	np	np	np	nn	nn	nn	nn	--	np	nn	np	np	nn	nn	nn	np	nn	nn	np	np	np	nn	np	np	nn	np	np	np	nn	np	np	np	nn	np	nn	np	nn	np
160_271_178	np	nn	nn	nn	nn	nn	np	np	nn	nn	nn	nn	nn	nn	np	np	np	np	np	nn	np	nn	nn	np	np	np	nn	np	np	nn	nn	nn	np	nn	nn	np	nn	nn	nn	np	nn	np	np	nn	np	nn	np	nn	np
160_271_179	np	nn	nn	nn	nn	nn	np	np	nn	nn	nn	nn	nn	nn	np	np	np	np	np	nn	np	nn	nn	np	np	np	nn	np	np	nn	nn	nn	np	nn	nn	np	nn	nn	nn	np	nn	nn	nn	np	nn	np	nn	np	nn
160_271_180	np	nn	nn	nn	nn	nn	np	np	nn	nn	nn	nn	nn	nn	--	np	np	np	--	nn	np	nn	nn	nn	nn	nn	np	nn	nn	np	np	np	nn	np	np	nn	np	np	np	nn	np	np	np	nn	np	nn	np	np	nn
160_271_181	np	nn	nn	nn	nn	nn	np	np	nn	nn	nn	nn	nn	np	nn	nn	nn	nn	nn	np	nn	np	np	nn	nn	nn	np	nn	nn	np	np	np	nn	np	np	nn	np	np	np	nn	np	np	np	nn	nn	np	nn	np	nn
160_271_183	np	np	--	np	np	np	nn	nn	np	np	np	np	np	np	nn	nn	nn	nn	nn	np	nn	np	np	nn	--	nn	np	nn	--	np	np	np	nn	np	np	nn	np	np	np	nn	np	np	np	nn	np	nn	np	nn	np
160_271_184	nn	np	np	np	np	np	nn	nn	np	np	np	np	np	np	--	nn	nn	nn	--	np	nn	np	np	nn	nn	nn	np	nn	nn	np	np	np	nn	np	np	nn	np	np	np	nn	np	np	np	nn	np	nn	np	nn	np
160_271_185	np	nn	nn	nn	nn	nn	nn	nn	np	np	np	np	np	np	nn	nn	nn	nn	--	np	nn	np	np	nn	nn	nn	np	nn	nn	np	np	np	nn	np	np	nn	np	np	np	nn	np	np	np	nn	np	nn	np	nn	np
160_271_187	np	nn	np	np	np	np	nn	nn	np	np	nn	nn	nn	nn	np	np	np	np	np	nn	np	nn	nn	np	np	np	nn	np	np	nn	nn	nn	np	nn	nn	np	nn	nn	--	np	nn	nn	nn	np	nn	nn	nn	np	nn
160_271_189	nn	--	np	np	np	np	--	nn	np	np	np	np	np	np	nn	nn	nn	nn	nn	np	nn	np	np	nn	--	nn	np	nn	nn	np	np	np	nn	np	np	nn	np	np	np	nn	np	np	np	nn	np	nn	np	nn	np
160_271_193	nn	np	np	np	np	np	nn	nn	np	np	np	np	np	np	nn	nn	nn	nn	--	np	nn	np	np	nn	nn	nn	np	nn	nn	np	np	np	nn	np	np	nn	np	np	--	nn	np	np	np	nn	np	nn	np	nn	np
160_271_194	np	nn	nn	nn	nn	nn	np	np	nn	nn	nn	nn	nn	nn	--	np	np	np	np	nn	np	nn	nn	np	nn	nn	np	nn	nn	np	np	np	nn	np	np	nn	np	np	np	nn	np	np	np	nn	np	nn	np	nn	np
160_271_196	np	nn	--	nn	nn	nn	--	np	nn	nn	nn	nn	nn	nn	np	np	np	np	np	nn	np	nn	nn	np	--	np	nn	np	np	nn	nn	--	np	nn	nn	np	nn	nn	nn	np	nn	nn	nn	np	nn	np	nn	np	nn
160_271_197	nn	--	np	np	np	np	--	np	nn	nn	nn	nn	nn	nn	np	np	np	np	--	nn	np	nn	nn	np	np	np	nn	np	np	nn	nn	nn	np	nn	nn	np	nn	nn	nn	np	nn	nn	nn	np	nn	np	nn	np	nn
160_271_198	np	--	--	nn	nn	nn	nn	nn	np	np	np	np	np	np	nn	nn	nn	nn	--	np	nn	np	np	nn	nn	nn	np	nn	nn	np	np	np	nn	np	np	nn	np	np	np	nn	np	np	np	nn	np	nn	np	nn	np
160_271_200	nn	np	np	np	np	np	nn	np	nn	nn	nn	nn	nn	nn	np	np	np	np	np	nn	np	nn	nn	np	--	np	nn	np	np	nn	nn	nn	np	nn	nn	np	nn	nn	nn	np	nn	nn	nn	np	nn	np	nn	np	nn
160_271_208	np	nn	nn	nn	nn	nn	--	np	nn	nn	nn	nn	nn	nn	np	np	np	np	np	nn	np	nn	nn	np	np	np	nn	np	--	nn	nn	nn	np	nn	nn	np	nn	nn	nn	np	nn	nn	nn	np	nn	np	nn	np	nn
160_271_209	nn	nn	np	np	np	np	nn	nn	np	np	np	np	np	np	nn	nn	nn	nn	nn	np	nn	np	np	nn	np	np	nn	np	--	nn	nn	nn	np	nn	nn	np	nn	nn	nn	np	nn	nn	nn	np	nn	np	nn	np	nn
160_271_210	np	nn	nn	nn	nn	nn	--	np	nn	nn	nn	nn	nn	nn	np	np	np	np	np	nn	np	nn	nn	nn	nn	nn	np	nn	nn	np	np	np	nn	np	np	--	np	np	np	nn	np	np	np	nn	np	nn	np	nn	np
160_271_213	np	--	--	nn	nn	nn	np	np	nn	nn	nn	nn	nn	nn	np	np	np	np	np	nn	np	nn	nn	np	np	np	nn	np	np	nn	nn	nn	np	nn	nn	np	nn	nn	nn	np	np	np	np	nn	np	nn	np	nn	np
160_271_214	nn	np	np	np	np	np	--	nn	np	np	np	np	np	np	nn	nn	nn	nn	nn	np	nn	nn	np	nn	nn	nn	np	nn	nn	np	np	np	nn	np	np	nn	np	np	np	nn	np	np	np	nn	np	nn	np	nn	np
160_271_215	nn	np	np	np	np	np	nn	nn	np	np	np	np	np	np	--	nn	nn	nn	--	np	nn	np	np	nn	nn	nn	np	nn	nn	np	np	np	nn	np	np	nn	np	np	--	nn	np	np	nn	np	nn	np	nn	np	nn
160_271_217	nn	--	np	np	np	np	nn	nn	np	np	np	np	np	np	nn	nn	nn	nn	--	np	nn	np	np	np	np	np	nn	np	np	nn	nn	nn	np	nn	nn	np	nn	nn	nn	np	nn	nn	nn	np	nn	np	nn	np	nn
160_271_218	nn	np	np	np	np	np	nn	nn	np	np	np	np	np	np	nn	nn	nn	nn	--	np	nn	nn	np	nn	nn	nn	np	nn	nn	np	np	np	nn	np	np	nn	np	np	np	nn	np	np	np	nn	np	nn	np	nn	np
160_271_219	np	nn	nn	nn	nn	nn	np	np	nn	nn	nn	nn	nn	nn	np	np	np	np	np	nn	np	nn	nn	np	np	np	nn	np	np	nn	nn	nn	np	nn	nn	np	--	nn	nn	np	nn	nn	nn	np	nn	np	nn	np	nn
160_271_221	np	nn	nn	nn	nn	nn	np	np	nn	nn	nn	nn	nn	nn	--	np	np	np	np	nn	np	nn	nn	np	np	np	nn	np	np	nn	np	np	nn	np	np	nn	np	np	np	nn	np	np	np	nn	np	nn	np	nn	np
160_271_222	nn	--	np	np	np	np	--	nn	np	np	np	np	np	np	--	nn	nn	nn	nn	np	nn	np	np	nn	--	nn	np	nn	nn	np	np	np	nn	np	np	nn	np	np	np	np	np	np	np	nn	np	nn	np	np	nn
160_271_235	nn	np	np	np	np	np	nn	nn	np	np	np	np	np	np	nn	nn	nn	nn	--	np	nn	np	np	nn	--	nn	np	nn	nn	np	np	np	nn	np	np	nn	np	np	np	nn	np	np	np	nn	np	nn	np	nn	np
160_271_300	np	nn	nn	nn	nn	nn	np	np	nn	nn	nn	nn	nn	nn	np	np	np	np	np	nn	np	nn	nn	np	--	np	nn	np	--	nn	nn	nn	np	nn	nn	np	--	nn	nn	np	nn	nn	nn	np	nn	np	nn	np	nn
160_271_301	np	nn	nn	nn	nn	nn	np	np	nn	nn	nn	nn	nn	nn	np	np	np	np	np	nn	np	nn	nn	nn	nn	nn	np	nn	nn	np	np	np	nn	np	np	nn	np	np	np	nn	np	np	np	nn	np	nn	np	nn	np
160_271_302	np	nn	nn	nn	nn	nn	np	np	nn	nn	nn	nn	nn	nn	np	np	np	np	np	nn	np	nn	nn	np	np	np	nn	np	--	nn	nn	nn	np	nn	nn	np	nn	nn	nn	np	nn	nn	nn	np	nn	np	nn	np	nn
160_271_303	nn	np	np	np	np	np	nn	nn	np	np	np	np	np	np	nn	nn	nn	nn	nn	np	nn	np	np	nn	nn	nn	np	nn	nn	np	np	np	nn	np	np	nn	np	np	np	nn	np	np	np	nn	np	nn	np	nn	np
160_271_304	nn	np	np	np	np	np	nn	nn	np	np	np	np	np	np	nn	--	nn	nn	nn	np	nn	np	np	nn	nn	nn	np	nn	--	np	np	np	nn	np	np	nn	np	np	np	np	np	np	np	np	nn	np	nn	np	nn
160_271_305	nn	np	np	np	np	np	nn	nn	np	np	np	np	np	np	nn	nn	nn	nn	nn	np	nn	np	np	nn	nn	nn	np	nn	nn	np	np	np	nn	np	np	nn	np	np	np	nn	np	np	np	nn	np	nn	np	nn	np
160_271_306	np	nn	nn	nn	nn	nn	np	np	nn	nn	nn	nn	nn	nn	np	np	np	np	np	nn	np	nn	nn	np	np	np	nn	np	np	nn	nn	nn	np	nn	nn	np	nn	nn	nn	np	nn	nn	nn	np	nn	np	nn	np	nn
160_271_307	np	nn	nn	nn	nn	nn	np	np	nn	nn	nn	nn	nn	nn	np	np	np	np	np	nn	np	nn	nn	np	np	np	nn	np	np	nn	nn	nn	np	nn	nn	np	nn	nn	nn	np	nn	nn	nn	np	np	nn	np	nn	np
160_271_308	nn	np	np	np	np	np	nn	nn	np	np	np	np	np	np	nn	nn	nn	nn	nn	np	nn	np	np	nn	nn	nn	np	nn	nn	np	np	np	nn	np	np	nn	np	np	np	nn	np	np	np	nn	np	nn	np	nn	np
160_271_309	nn	np	np	np	np	np	nn	nn	np	np	np	np	np	np	nn	nn	nn	nn	nn	np	nn	np	np	nn	nn	nn	np	np	np	nn	nn	nn	np	nn	nn	np	nn	nn	nn	np	nn	nn	nn	np	nn	np	nn	nn	np
160_271_310	np	nn	nn	nn	nn	nn	np	np	nn	nn	nn	nn	nn	nn	np	np	np	np	np	nn	np	nn	nn	np	np	np	nn	np	np	nn	nn	nn	np	nn	nn	np	nn	nn	nn	np	nn	nn	nn	np	nn	np	nn	np	nn
160_271_311	np	nn	nn	nn	nn	nn	np	np	nn	nn	nn	nn	nn	nn	np	np	np	np	np	nn	np	nn	nn	np	np	np	nn	np	--	nn	nn	nn	np	nn	nn	np	nn	nn	nn	np	nn	nn	nn	np	nn	np	nn	np	nn
160_271_312	np	nn	nn	nn	nn	nn	np	np	nn	nn	nn	nn	nn	nn	np	np	np	np	np	nn	np	nn	nn	np	np	np	nn	np	np	nn	nn	nn	np	nn	nn	np	nn	nn	nn	np	nn	nn	nn	np	nn	np	nn	np	nn
160_271_313	np	nn	nn	nn	nn	nn	np	np	nn	nn	nn	nn	nn	nn	np	np	np	np	np	nn	np	nn	nn	np	np	np	nn	np	np	nn	nn	nn	np	nn	nn	np	nn	nn	nn	np	nn	nn	nn	np	nn	np	nn	nn	np
160_271_314	nn	np	np	np	np	np	nn	nn	np	np	np	np	np	np	nn	nn	nn	nn	nn	nn	np	nn	nn	np	np	np	nn	np	np	nn	nn	nn	np	nn	nn	np	nn	nn	nn	np	nn	nn	nn	np	nn	np	nn	np	nn
160_271_315	nn	np	np	np	np	np	nn	nn	np	np	np	np	np	np	nn	nn	nn	nn	nn	np	nn	np	np	nn	nn	nn	np	nn	nn	np	np	np	nn	np	np	np	nn	nn	nn	np	nn	nn	nn	np	nn	np	nn	np	nn
160_271_316	nn	np	np	np	np	np	nn	nn	np	np	np	np	np	np	nn	nn	nn	nn	nn	np	nn	np	np	nn	nn	nn	np	nn	nn	np	np	np	nn	np	np	nn	np	np	np	nn	np	np	np	nn	nn	np	nn	np	nn
160_271_317	nn	np	np	np	np	np	nn	np	nn	nn	nn	nn	nn	nn	np	np	np	np	np	nn	np	nn	nn	np	np	np	nn	np	np	nn	nn	nn	np	nn	nn	np	nn	nn	nn	np	nn	nn	nn	np	nn	np	nn	np	nn
160_271_318	nn	nn	nn	nn	nn	nn	np	np	nn	nn	nn	nn	nn	nn	np	np	np	np	np	nn	np	nn	nn	np	np	np	nn	np	np	nn	nn	nn	np	nn	nn	nn	np	np	np	nn	np	np	np	nn	np	nn	np	nn	np
160_271_319	nn	np	np	np	np	np	nn	nn	np	np	np	np	np	np	nn	nn	nn	nn	nn	np	nn	np	np	nn	nn	nn	np	nn	--	np	np	np	nn	np	np	nn	np	np	np	nn	np	np	np	nn	np	nn	np	nn	np
160_271_320	nn	np	np	np	np	np	nn	np	nn	nn	nn	nn	nn	nn	np	np	np	np	np	nn	np	nn	nn	np	np	np	nn	np	np	nn	nn	nn	np	nn	nn	np	nn	nn	nn	np	nn	nn	nn	np	nn	np	nn	np	nn
160_271_321	nn	np	np	np	np	np	nn	nn	np	np	np	np	np	np	nn	nn	nn	nn	nn	np	nn	np	np	nn	nn	nn	np	nn	nn	np	np	np	nn	np	np	nn	np	np	np	nn	nn	nn	nn	np	nn	np	nn	np	nn
160_271_322	np	nn	nn	nn	nn	nn	np	np	nn	nn	nn	nn	nn	nn	np	np	np	np	np	nn	np	np	np	nn	nn	nn	np	nn	nn	np	np	np	nn	np	np	nn	np	np	np	nn	np	np	np	nn	np	nn	np	nn	np
160_271_323	np	nn	nn	nn	nn	nn	np	np	nn	nn	nn	nn	nn	nn	np	np	np	np	np	nn	np	nn	nn	np	np	np	nn	np	np	nn	nn	nn	np	nn	nn	np	nn	nn	nn	np	nn	nn	nn	np	nn	np	nn	np	nn
160_271_324	np	np	np	np	np	np	nn	nn	np	np	np	np	np	np	nn	nn	nn	nn	nn	np	nn	np	np	nn	nn	nn	np	nn	nn	np	np	np	nn	np	np	nn	np	np	np	nn	np	np	np	nn	np	nn	np	nn	np
160_271_325	np	nn	nn	nn	nn	nn	np	np	nn	nn	nn	nn	nn	nn	np	np	np	np	np	nn	np	nn	nn	np	np	np	nn	np	np	nn	nn	nn	np	nn	nn	np	nn	nn	nn	np	nn	nn	nn	np	nn	np	nn	np	nn
160_271_326	nn	np	np	np	np	np	nn	nn	np	np	np	np	np	np	nn	nn	nn	nn	nn	np	nn	np	np	nn	nn	nn	np	nn	nn	np	np	np	nn	np	np	nn	np	np	np	nn	np	np	np	nn	np	nn	np	nn	np
160_271_327	np	nn	nn	nn	nn	nn	np	np	nn	nn	nn	nn	nn	nn	np	np	np	np	np	nn	np	nn	nn	np	np	np	nn	np	np	nn	nn	nn	np	nn	nn	np	nn	nn	nn	np	nn	nn	nn	np	nn	np	nn	np	nn
160_271_328	nn	np	np	np	np	np	nn	nn	np	np	np	np	np	np	nn	nn	nn	nn	nn	np	nn	np	np	nn	np	np	nn	np	np	nn	nn	nn	np	nn	nn	np	np	np	np	np	np	np	np	nn	nn	np	nn	np	nn
160_271_329	np	nn	nn	nn	nn	nn	np	np	nn	nn	nn	nn	nn	nn	nn	nn	nn	nn	nn	np	nn	np	np	nn	nn	nn	np	nn	nn	np	np	np	nn	np	np	nn	np	np	np	nn	np	np	np	nn	np	nn	np	nn	np
160_271_330	np	nn	nn	nn	nn	nn	np	np	nn	nn	nn	nn	nn	nn	np	np	np	np	np	nn	np	nn	nn	nn	nn	nn	np	nn	--	np	np	np	nn	np	np	--	np	np	np	nn	np	np	np	nn	np	nn	np	nn	np
160_271_331	np	nn	nn	nn	nn	nn	np	np	nn	nn	nn	nn	nn	nn	np	np	nn	nn	nn	np	nn	np	np	nn	nn	nn	np	nn	nn	np	np	np	nn	np	nn	--	np	np	np	nn	np	np	np	nn	np	nn	np	nn	np
160_271_332	np	nn	nn	nn	nn	nn	np	np	nn	nn	nn	nn	nn	nn	np	np	np	np	np	nn	np	nn	nn	np	np	np	nn	np	np	nn	nn	nn	np	nn	nn	np	nn	nn	nn	np	nn	nn	nn	np	np	nn	np	nn	np
160_271_333	nn	np	np	np	np	np	nn	nn	np	np	np	np	np	np	nn	nn	nn	nn	nn	np	nn	np	np	nn	nn	nn	np	nn	nn	np	np	np	nn	np	np	nn	np	np	np	nn	np	np	np	nn	np	nn	np	nn	np
160_271_334	nn	np	np	np	np	np	nn	nn	np	np	np	np	np	np	nn	nn	nn	nn	nn	np	nn	np	np	nn	nn	nn	np	nn	nn	np	np	np	nn	np	np	nn	np	np	np	nn	np	np	np	nn	np	nn	np	nn	np
160_271_335	nn	np	np	np	np	np	nn	nn	np	np	np	np	np	np	nn	nn	nn	nn	nn	np	nn	np	np	nn	nn	nn	np	nn	nn	np	np	np	nn	np	np	nn	np	np	np	nn	np	np	np	nn	np	nn	np	nn	np
160_271_336	nn	nn	nn	nn	nn	nn	nn	nn	nn	nn	nn	nn	nn	nn	nn	nn	np	nn	nn	nn	nn	nn	nn	nn	nn	nn	nn	nn	np	nn	nn	np	nn	nn	nn	nn	nn	nn	nn	np	np	nn	nn	nn	nn	np	nn	nn	nn
160_271_337	np	nn	nn	nn	nn	nn	np	np	nn	nn	nn	nn	nn	nn	np	np	np	np	np	nn	np	nn	nn	nn	nn	nn	np	nn	nn	np	np	np	nn	np	np	nn	np	np	np	nn	np	np	np	nn	np	nn	np	nn	np
160_271_338	np	nn	nn	nn	nn	nn	np	np	nn	nn	nn	nn	nn	nn	np	np	np	np	np	nn	np	nn	nn	np	np	np	nn	np	np	nn	nn	nn	np	nn	nn	np	nn	nn	nn	np	nn	np	np	nn	np	nn	np	nn	np
160_271_339	np	nn	nn	nn	nn	nn	np	np	nn	nn	nn	nn	nn	nn	nn	nn	nn	nn	nn	np	nn	np	np	nn	nn	nn	np	nn	nn	np	np	np	nn	np	np	nn	np	np	np	nn	np	np	np	nn	np	nn	np	nn	np
160_271_340	nn	np	np	np	np	np	nn	nn	np	np	np	np	np	np	nn	nn	nn	nn	nn	np	nn	np	np	nn	nn	nn	np	nn	nn	np	np	np	nn	np	np	nn	nn	nn	nn	np	nn	nn	nn	np	nn	np	nn	np	nn
160_271_341	np	nn	nn	nn	nn	nn	np	np	nn	nn	nn	nn	nn	nn	np	np	np	np	np	nn	np	nn	nn	np	np	np	nn	np	np	nn	nn	nn	np	nn	nn	np	nn	nn	nn	np	nn	nn	nn	np	nn	np	nn	np	nn
160_271_342	nn	np	np	np	np	np	nn	nn	np	np	np	np	np	np	nn	nn	nn	nn	np	nn	np	nn	nn	np	np	np	nn	np	np	nn	nn	nn	np	nn	nn	np	nn	nn	nn	np	nn	nn	nn	np	nn	np	nn	np	nn
160_271_343	np	nn	nn	nn	nn	nn	np	np	nn	nn	nn	nn	nn	nn	np	np	np	np	np	nn	np	nn	nn	np	np	np	nn	np	np	nn	nn	nn	nn	np	np	nn	np	np	np	nn	np	np	np	nn	np	nn	np	nn	np
160_271_344	nn	np	np	np	np	np	nn	nn	np	np	np	np	np	np	nn	nn	nn	nn	nn	np	nn	np	np	nn	nn	nn	np	nn	nn	np	np	np	nn	np	np	nn	np	np	np	nn	np	np	np	nn	np	nn	np	nn	np
160_271_345	nn	np	np	np	np	np	nn	nn	--	np	np	np	np	np	nn	nn	nn	nn	nn	np	nn	np	np	nn	nn	nn	np	nn	--	np	np	np	nn	nn	nn	np	nn	nn	nn	np	nn	nn	nn	np	np	nn	np	nn	np
160_271_346	np	nn	nn	nn	nn	nn	np	np	nn	nn	nn	nn	nn	nn	np	np	np	np	np	nn	np	nn	nn	np	np	np	nn	np	--	nn	nn	nn	np	nn	nn	np	nn	nn	nn	np	nn	nn	nn	np	nn	np	nn	np	nn
160_271_347	nn	np	np	np	np	np	nn	nn	np	np	np	np	np	np	nn	nn	nn	nn	nn	np	nn	np	nn	nn	nn	nn	np	nn	nn	np	np	np	nn	np	np	nn	np	np	np	nn	np	np	np	nn	np	nn	np	np	np
160_271_348	np	nn	nn	nn	nn	nn	np	np	nn	nn	nn	nn	nn	nn	np	np	np	np	np	nn	np	nn	nn	np	np	np	nn	np	np	nn	nn	nn	np	nn	nn	np	nn	nn	nn	np	nn	nn	nn	np	nn	np	nn	np	nn
160_271_349	nn	np	np	np	np	np	nn	nn	np	np	np	np	np	np	nn	nn	nn	nn	nn	np	nn	np	np	nn	nn	nn	np	nn	nn	np	np	np	nn	np	np	nn	np	np	np	nn	np	np	np	nn	np	nn	np	nn	np
160_271_350	nn	np	np	np	np	np	nn	nn	np	np	np	np	np	np	nn	nn	nn	nn	nn	np	nn	np	np	nn	nn	nn	np	nn	nn	np	np	np	nn	np	np	nn	np	np	np	nn	np	np	np	nn	np	nn	np	nn	np
160_271_351	nn	np	np	np	np	np	nn	nn	np	np	np	np	np	np	nn	nn	nn	nn	nn	np	nn	np	np	nn	nn	nn	np	nn	nn	np	np	np	nn	np	np	nn	np	np	np	nn	np	np	np	nn	np	nn	np	nn	np
160_271_352	np	nn	nn	nn	nn	nn	np	np	nn	nn	nn	nn	nn	nn	np	np	np	np	np	nn	np	nn	nn	np	np	np	nn	np	np	nn	nn	nn	np	nn	nn	np	nn	nn	nn	np	nn	nn	np	nn	np	nn	np	nn	np
160_271_353	nn	np	np	np	np	np	nn	np	nn	nn	nn	nn	nn	nn	np	np	np	np	np	nn	np	nn	nn	np	np	np	nn	np	np	nn	nn	nn	np	nn	nn	np	nn	nn	nn	np	nn	nn	nn	np	nn	np	nn	np	nn
160_271_355	nn	np	np	np	np	np	nn	nn	np	np	np	np	np	np	nn	nn	nn	nn	nn	np	nn	np	np	nn	nn	nn	np	nn	nn	np	np	np	nn	np	np	np	nn	nn	np	np	nn	nn	nn	np	nn	np	nn	np	nn
160_271_356	nn	np	np	np	np	np	nn	nn	np	np	np	np	np	np	np	np	np	np	np	nn	np	nn	nn	np	np	np	nn	np	np	nn	nn	nn	np	nn	nn	np	nn	nn	nn	np	nn	nn	nn	np	nn	np	nn	np	nn
160_271_357	np	nn	nn	nn	nn	nn	np	nn	np	np	np	np	np	np	nn	nn	nn	nn	nn	np	nn	np	np	nn	nn	nn	np	nn	nn	np	np	np	nn	np	np	nn	np	np	np	nn	np	np	np	nn	np	nn	np	nn	np
160_271_358	np	nn	nn	nn	nn	nn	np	np	nn	nn	nn	nn	nn	nn	np	np	np	np	np	nn	np	nn	nn	np	np	np	nn	np	np	nn	nn	np	nn	np	np	nn	np	np	np	nn	np	np	np	nn	np	nn	np	nn	np
160_271_360	np	nn	nn	nn	nn	nn	np	nn	np	np	np	np	np	np	np	nn	nn	nn	nn	np	nn	np	np	nn	nn	nn	np	nn	nn	np	np	np	nn	np	nn	nn	np	np	np	nn	np	np	np	nn	np	nn	np	nn	np
160_271_361	nn	np	np	np	np	np	nn	nn	np	np	np	np	np	np	nn	nn	nn	nn	nn	np	nn	np	np	nn	nn	nn	np	nn	nn	np	np	np	nn	np	np	nn	np	np	np	nn	nn	nn	nn	np	nn	np	nn	np	nn
160_271_362	np	nn	nn	nn	nn	nn	np	np	nn	nn	nn	nn	nn	nn	np	np	np	np	np	nn	np	nn	nn	np	np	np	nn	np	np	nn	nn	nn	np	nn	nn	np	nn	nn	nn	np	nn	nn	nn	np	nn	np	nn	np	nn
160_271_363	np	nn	nn	nn	nn	nn	np	np	nn	nn	nn	nn	nn	nn	np	np	np	np	np	nn	np	nn	nn	nn	nn	nn	np	nn	--	np	np	np	nn	np	np	nn	np	np	np	nn	np	np	np	nn	np	nn	np	nn	np
160_271_364	nn	np	np	np	np	np	nn	nn	np	np	np	np	np	np	nn	nn	nn	nn	nn	np	nn	np	np	nn	nn	nn	np	nn	nn	np	np	np	nn	np	np	nn	np	np	np	nn	np	np	np	nn	np	nn	np	nn	np
160_271_365	nn	np	np	np	np	np	nn	nn	np	np	np	np	np	np	nn	nn	nn	nn	nn	np	nn	np	np	nn	nn	nn	np	nn	nn	np	np	np	nn	np	np	nn	np	np	np	nn	np	np	np	nn	nn	np	nn	np	nn
160_271_366	nn	np	np	np	np	np	nn	nn	np	np	np	np	np	np	nn	nn	nn	nn	nn	np	nn	np	np	nn	nn	nn	np	nn	nn	np	np	np	nn	np	nn	nn	np	np	np	nn	np	np	np	nn	np	nn	np	nn	np
160_271_367	nn	np	np	np	np	np	nn	nn	np	np	np	np	np	np	nn	nn	nn	nn	nn	np	nn	np	np	nn	--	nn	np	nn	nn	np	np	np	nn	np	np	nn	np	np	np	nn	np	np	np	nn	np	nn	np	nn	np
160_271_368	nn	np	np	np	np	np	nn	nn	np	np	np	np	np	np	nn	nn	nn	nn	nn	np	np	nn	nn	np	np	np	nn	np	np	nn	nn	nn	np	nn	nn	np	nn	nn	nn	np	nn	nn	nn	np	nn	np	nn	np	nn
160_271_370	np	nn	nn	nn	nn	nn	np	np	nn	nn	nn	nn	nn	nn	np	np	np	np	np	nn	np	nn	nn	np	np	np	nn	np	np	nn	nn	nn	nn	np	np	nn	np	np	np	nn	np	np	np	nn	np	nn	np	nn	np
160_271_371	nn	np	np	np	np	np	np	np	nn	nn	nn	nn	nn	nn	np	np	np	np	np	nn	np	nn	nn	np	--	np	nn	np	np	nn	nn	nn	np	nn	nn	np	nn	nn	nn	np	nn	nn	nn	nn	np	nn	np	nn	np
160_271_372	nn	np	np	np	np	np	nn	nn	np	np	np	np	np	np	nn	nn	nn	nn	nn	np	nn	np	np	nn	nn	nn	np	nn	nn	np	np	np	nn	np	np	nn	np	np	np	nn	np	np	np	nn	np	nn	np	nn	np
160_271_373	np	nn	nn	nn	nn	nn	np	np	nn	nn	nn	nn	nn	nn	np	np	np	np	np	nn	np	nn	nn	np	np	np	nn	np	np	nn	nn	nn	np	nn	nn	np	nn	nn	nn	np	nn	nn	nn	np	nn	np	nn	np	nn
160_271_374	np	nn	nn	nn	nn	nn	nn	nn	np	np	np	np	np	np	nn	nn	nn	nn	nn	np	nn	np	np	nn	nn	nn	np	nn	nn	np	np	np	nn	np	np	nn	np	np	np	nn	np	np	np	nn	np	nn	np	nn	np
160_271_375	nn	np	np	np	np	np	nn	nn	np	np	np	np	np	np	nn	nn	nn	nn	nn	np	nn	np	np	nn	nn	nn	np	nn	nn	np	np	np	nn	np	np	nn	np	np	np	nn	np	np	np	nn	np	nn	np	nn	np
160_271_376	nn	np	np	np	np	np	nn	nn	np	np	np	np	np	np	nn	nn	nn	nn	nn	np	nn	np	np	nn	nn	nn	np	nn	nn	np	np	np	nn	np	np	nn	np	np	np	nn	np	np	np	nn	np	nn	np	nn	np
160_271_377	nn	np	np	np	np	np	nn	nn	np	np	np	np	np	np	nn	nn	nn	nn	nn	np	nn	np	np	nn	np	np	nn	np	np	nn	nn	nn	np	nn	nn	np	nn	nn	nn	np	nn	nn	nn	np	nn	np	nn	np	nn
160_271_378	nn	np	np	np	np	np	nn	nn	np	np	np	np	np	np	nn	nn	nn	nn	nn	np	nn	np	np	nn	nn	nn	np	nn	nn	np	np	np	nn	np	np	nn	np	np	np	np	np	np	np	nn	np	nn	np	nn	np
160_271_379	nn	np	np	np	np	np	nn	nn	np	np	np	np	np	np	nn	nn	nn	nn	nn	np	nn	np	np	nn	nn	nn	np	nn	nn	np	np	np	nn	np	np	nn	np	np	np	nn	np	np	np	nn	np	nn	np	nn	np
160_271_380	nn	np	np	np	np	np	nn	nn	np	np	np	np	np	np	nn	nn	nn	nn	nn	np	nn	np	np	nn	nn	nn	np	nn	nn	np	np	np	nn	np	np	nn	np	np	np	nn	np	np	np	nn	np	nn	np	nn	np
160_271_381	nn	np	np	np	np	np	nn	nn	np	np	np	np	np	np	nn	nn	nn	nn	nn	np	nn	np	np	nn	nn	nn	np	nn	nn	np	np	np	nn	np	np	nn	np	np	np	nn	np	np	np	nn	np	nn	np	nn	np
160_271_382	nn	np	np	np	np	np	nn	nn	np	np	np	np	np	np	nn	nn	nn	nn	nn	np	nn	np	np	np	np	np	nn	np	np	nn	nn	nn	np	nn	nn	np	nn	nn	nn	np	nn	nn	nn	np	nn	np	nn	np	nn
160_271_383	nn	np	np	np	np	np	nn	nn	np	np	np	np	np	np	nn	nn	nn	nn	nn	np	nn	np	np	nn	nn	nn	np	nn	nn	np	np	np	nn	np	np	nn	np	np	np	nn	np	np	nn	np	nn	np	nn	np	nn
160_271_384	nn	np	np	np	np	np	nn	nn	np	np	np	np	np	np	nn	nn	nn	nn	nn	np	nn	np	np	nn	nn	nn	np	nn	nn	np	np	np	nn	np	np	nn	np	np	np	nn	np	np	np	nn	np	nn	nn	np	nn
160_271_385	np	nn	nn	nn	nn	nn	np	np	nn	nn	nn	nn	nn	nn	np	np	np	np	np	nn	np	nn	nn	np	np	np	nn	np	np	nn	nn	np	nn	np	np	nn	np	np	np	nn	np	np	np	nn	np	nn	np	nn	np
160_271_386	np	nn	nn	nn	nn	nn	np	np	nn	nn	nn	nn	nn	nn	np	np	np	np	np	nn	np	nn	nn	np	np	np	nn	np	np	nn	nn	nn	np	nn	nn	np	nn	nn	nn	np	nn	nn	nn	np	np	nn	np	nn	np
160_271_387	nn	np	np	np	np	np	nn	nn	np	np	np	np	np	np	nn	nn	nn	nn	nn	np	nn	np	np	nn	nn	nn	np	nn	--	np	np	np	nn	np	np	nn	nn	np	np	nn	np	np	np	nn	np	nn	np	nn	np
160_271_388	np	nn	nn	nn	nn	nn	np	np	nn	nn	nn	nn	nn	nn	np	np	np	np	np	nn	np	nn	nn	np	np	np	nn	np	np	nn	nn	nn	np	nn	nn	np	nn	nn	nn	np	nn	np	np	nn	np	nn	np	nn	np
160_271_389	nn	np	np	np	np	np	nn	nn	np	np	np	np	np	np	nn	nn	nn	nn	nn	np	nn	np	np	np	np	np	nn	np	np	nn	nn	nn	np	nn	nn	np	nn	nn	nn	np	nn	nn	nn	np	nn	np	nn	np	nn
160_271_390	np	nn	nn	nn	nn	nn	np	np	nn	nn	nn	nn	nn	nn	np	np	np	np	np	nn	np	nn	nn	np	np	np	nn	np	np	nn	nn	nn	np	nn	nn	np	nn	nn	nn	np	nn	nn	nn	np	np	nn	np	nn	np
160_271_391	nn	np	np	np	np	np	nn	np	nn	nn	nn	nn	nn	nn	np	np	np	np	np	nn	np	nn	nn	np	np	np	nn	np	np	nn	nn	nn	np	nn	nn	np	nn	nn	nn	np	nn	nn	nn	np	nn	np	nn	np	nn
160_271_392	nn	np	np	np	np	np	nn	nn	np	np	np	np	np	np	nn	nn	nn	nn	nn	np	nn	np	np	nn	nn	nn	np	nn	--	np	np	np	nn	np	np	nn	np	np	np	nn	np	np	np	nn	np	nn	np	nn	np
160_271_393	np	nn	nn	nn	nn	nn	np	np	nn	nn	nn	nn	nn	nn	np	np	np	np	nn	nn	np	nn	nn	np	np	np	nn	np	--	nn	nn	nn	nn	np	np	nn	np	np	np	nn	np	np	np	nn	np	nn	nn	np	nn
160_271_394	np	nn	nn	nn	nn	nn	np	np	nn	nn	nn	nn	nn	nn	np	np	np	np	np	nn	np	nn	nn	np	np	np	nn	np	np	nn	nn	nn	np	nn	nn	np	nn	nn	nn	np	nn	nn	nn	np	nn	np	nn	np	nn
160_271_395	np	nn	nn	nn	nn	nn	np	np	nn	nn	nn	nn	nn	nn	np	np	np	np	np	nn	np	nn	nn	np	np	np	nn	np	np	nn	nn	nn	np	nn	nn	np	nn	nn	nn	np	nn	nn	nn	np	nn	np	nn	np	nn
160_271_396	np	nn	nn	nn	nn	nn	np	np	nn	nn	nn	nn	nn	nn	np	np	np	np	np	nn	np	nn	nn	np	np	np	nn	np	np	nn	nn	nn	np	nn	nn	np	nn	nn	nn	np	nn	nn	nn	np	np	nn	np	nn	np
160_271_397	nn	np	np	np	np	np	nn	nn	np	np	np	np	np	np	nn	nn	nn	nn	nn	np	nn	np	np	nn	nn	nn	np	nn	nn	np	np	np	nn	np	np	nn	np	np	np	nn	np	np	np	nn	np	nn	np	np	nn
160_271_398	np	nn	nn	nn	nn	nn	np	np	nn	nn	nn	nn	nn	nn	np	np	np	np	np	nn	np	nn	nn	np	np	np	nn	np	np	nn	nn	nn	np	nn	nn	np	nn	nn	nn	np	nn	nn	nn	np	nn	np	nn	np	nn
160_271_399	nn	np	np	np	np	np	nn	nn	np	np	np	np	np	np	nn	nn	nn	nn	nn	np	nn	np	np	nn	np	np	nn	np	--	nn	nn	nn	np	nn	nn	np	nn	nn	nn	np	nn	nn	nn	np	nn	np	nn	np	nn
160_271_400	np	nn	--	nn	nn	nn	np	np	nn	nn	nn	nn	nn	nn	np	np	np	np	np	nn	np	nn	nn	np	np	np	nn	np	np	nn	nn	nn	np	nn	nn	np	nn	nn	nn	np	nn	nn	nn	np	nn	np	nn	np	nn
160_271_401	np	nn	nn	nn	nn	nn	np	np	nn	nn	nn	nn	nn	nn	--	np	np	np	np	nn	np	nn	nn	np	np	np	nn	np	--	nn	nn	nn	np	nn	nn	np	nn	nn	nn	np	nn	nn	nn	np	nn	np	nn	np	nn
160_271_402	nn	np	np	np	np	np	nn	nn	np	np	np	np	np	np	nn	nn	nn	nn	nn	np	nn	np	np	nn	nn	nn	np	nn	nn	np	np	np	nn	np	np	nn	np	np	np	nn	np	np	np	nn	np	nn	np	nn	np
160_271_403	np	nn	nn	nn	nn	nn	np	np	nn	nn	nn	nn	nn	nn	np	np	np	np	np	nn	np	nn	nn	np	np	np	nn	np	np	nn	nn	nn	np	nn	nn	nn	np	np	np	nn	np	np	np	nn	np	nn	np	nn	np
160_271_404	nn	np	np	np	np	np	nn	nn	np	np	np	np	np	np	nn	nn	nn	nn	nn	np	nn	np	np	nn	nn	nn	np	nn	nn	np	np	np	nn	np	np	nn	np	np	np	nn	np	np	np	nn	np	nn	np	nn	np
160_271_405	nn	np	np	np	np	np	nn	nn	np	np	np	np	np	np	nn	nn	nn	nn	nn	np	nn	np	np	nn	nn	nn	np	np	np	nn	nn	nn	np	nn	nn	np	nn	nn	nn	np	nn	nn	nn	np	nn	np	nn	np	nn
160_271_406	np	nn	nn	nn	nn	nn	nn	np	nn	nn	nn	nn	nn	nn	np	np	np	np	--	nn	np	nn	nn	np	np	np	nn	np	--	nn	nn	nn	np	nn	nn	np	nn	nn	nn	np	nn	nn	nn	np	np	nn	np	nn	np
160_271_407	np	nn	nn	nn	nn	nn	np	np	nn	nn	nn	nn	nn	nn	np	np	np	np	np	nn	np	nn	nn	np	np	np	nn	np	np	nn	nn	nn	np	nn	nn	np	nn	nn	nn	np	nn	nn	nn	np	nn	np	nn	np	nn
160_271_408	np	nn	nn	nn	nn	nn	np	np	nn	nn	nn	nn	nn	nn	np	np	np	np	np	nn	np	nn	nn	np	np	np	nn	np	--	nn	nn	nn	np	nn	nn	np	nn	nn	nn	np	nn	nn	nn	np	nn	np	nn	np	nn
160_271_409	np	nn	nn	nn	nn	nn	np	np	nn	nn	nn	nn	nn	nn	np	np	np	--	np	nn	np	nn	nn	np	np	np	nn	np	np	nn	nn	nn	np	nn	nn	np	nn	nn	nn	np	nn	nn	nn	np	nn	np	nn	np	nn
160_271_410	nn	np	np	np	np	np	nn	nn	np	np	np	np	np	np	nn	nn	nn	nn	nn	np	nn	np	np	nn	nn	nn	np	nn	nn	np	np	np	nn	np	np	nn	np	np	np	nn	np	np	np	nn	np	nn	np	nn	np
160_271_411	nn	np	np	np	np	np	nn	nn	np	np	np	np	np	np	nn	nn	nn	nn	nn	np	nn	np	np	nn	nn	nn	np	nn	nn	np	np	np	nn	np	np	np	nn	nn	nn	np	nn	nn	nn	np	nn	np	nn	np	nn
160_271_412	nn	np	np	np	np	np	nn	nn	np	np	np	np	np	np	nn	nn	nn	nn	nn	np	nn	np	np	nn	nn	nn	np	nn	nn	np	np	np	nn	np	np	nn	nn	nn	nn	np	nn	nn	nn	np	nn	np	nn	np	nn
160_271_413	np	nn	nn	nn	nn	nn	np	np	nn	nn	nn	nn	nn	nn	np	np	np	np	np	nn	np	nn	nn	np	np	np	nn	np	np	nn	nn	nn	np	nn	nn	np	nn	nn	nn	np	nn	nn	nn	np	nn	np	nn	np	nn
160_271_414	nn	np	np	np	np	np	nn	nn	np	np	np	np	np	np	nn	nn	nn	nn	nn	np	nn	np	np	nn	--	nn	np	nn	--	np	np	np	nn	np	np	np	np	np	np	nn	np	np	np	nn	np	nn	np	nn	np
160_271_415	nn	np	np	np	np	np	nn	nn	np	np	np	np	np	np	nn	nn	nn	nn	nn	np	nn	np	np	nn	nn	nn	np	nn	nn	np	np	np	nn	np	np	nn	np	np	np	nn	np	np	np	nn	np	nn	np	nn	np
160_271_416	np	nn	nn	nn	nn	nn	np	np	nn	nn	nn	nn	nn	nn	np	np	np	np	np	nn	np	nn	nn	np	np	np	nn	np	np	nn	nn	nn	np	nn	nn	np	nn	nn	nn	np	nn	nn	nn	nn	np	nn	np	nn	np
160_271_417	nn	np	np	np	np	np	nn	nn	np	np	np	np	np	np	nn	nn	nn	nn	nn	np	nn	np	np	nn	nn	nn	np	nn	nn	np	np	np	nn	np	np	nn	np	np	np	nn	np	np	np	nn	np	nn	nn	np	nn
[truncated: 1,066 more columns]
